# Supplementary material for: Neuroligins Facilitate The Development of Bone Cancer Pain via Regulating Synaptic Transmission
Source: Research Square preprint supplement (doi:10.21203/rs.3.rs-991135/v1), 2021-11-09
Supplement: Supplementary file 1 [file 810032d100059d460a326a59.docx]

**Primers:**

β-actin: F: GGAGATTACTGCCCTGGCTCCTA, R: GACTCATCGTACTCCTGCTTGCTG;

Nlgn1: F: TGTGTTGGCAAGCTACGGTAATG, R: AAACACGGTGATTCGCAAGG;

Nlgn2: F: GATGAGCTGCCCTACGTCTTTG, R: TGGATGAACTTGGTGTCCTGTGG

Nlgn3: F: TGGTGCATCCTGTGTCAGTCTTC, R: TGCGAGCAAGCTGGTGTACTTC

Cherry: F: GCCAAGCTGAAGGTGACCAAGG, R: CGCCGTCCTCGAAGTTCATCAC

gcGFP: F: GACTTCAAGGAGGACGGCAACATC, R:CTTCTGCTTGTCGGCGGTGATATAG

**Antibodies:**
